# Supplementary material for: Eribulin rapidly inhibits TGF-β-induced Snail expression and can induce Slug expression in a Smad4-dependent manner
Source: PubMed Central journal article supplement (PMC6889360; doi:10.1038/s41416-019-0556-9), 2019-09-04
Supplement: 41416_2019_556_MOESM1_ESM.pdf [file 41416_2019_556_MOESM1_ESM.pdf]

Supplementary Figure 2

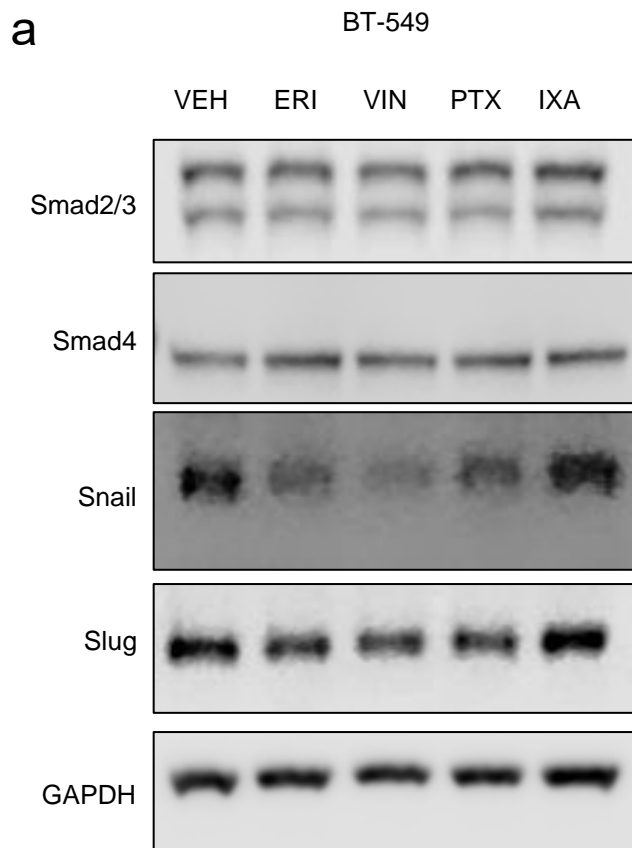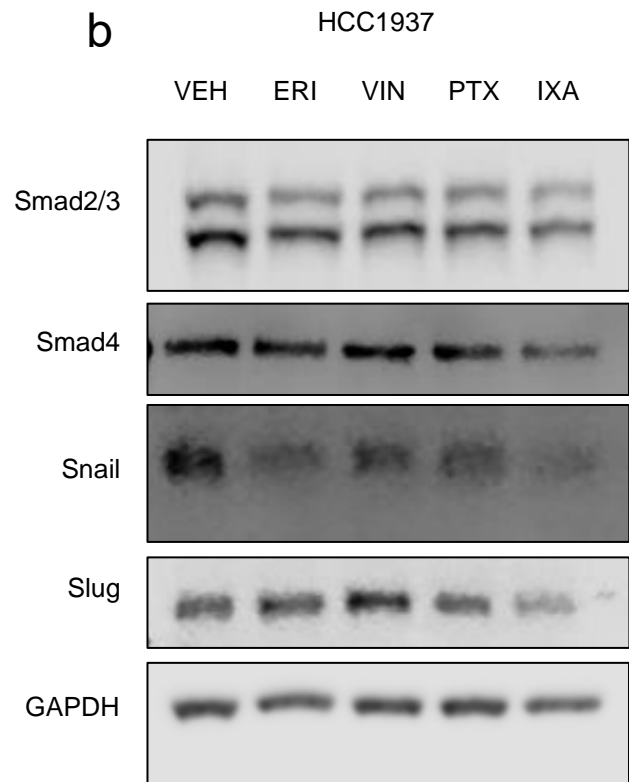

# Supplementary Figure 3

a

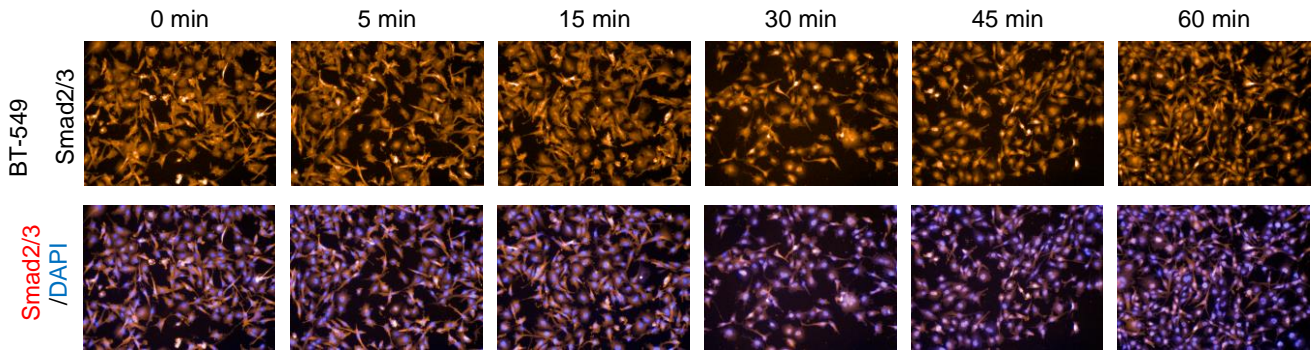

b

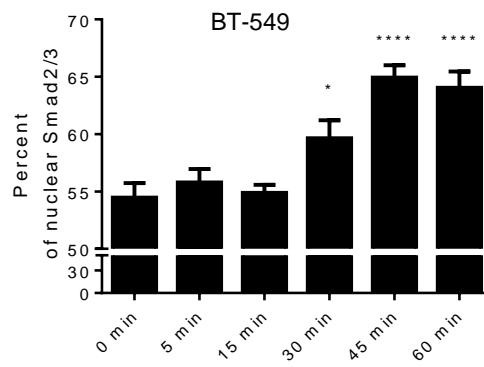

c

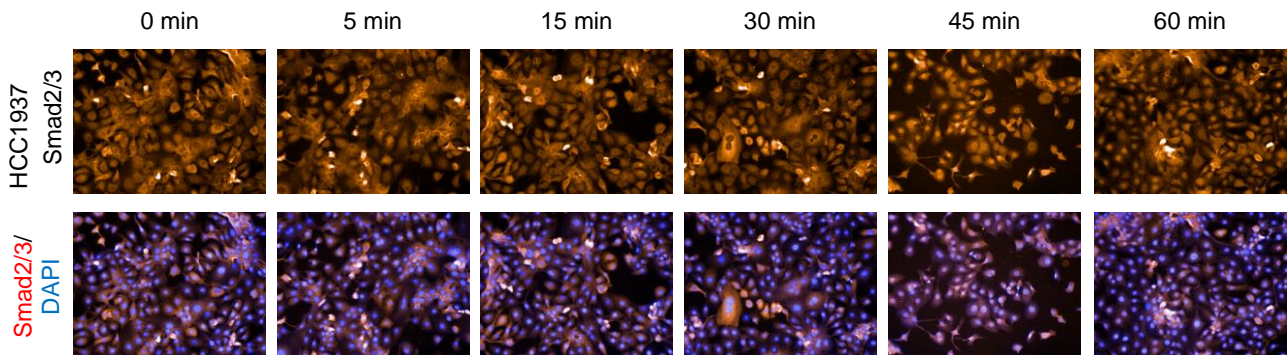

d

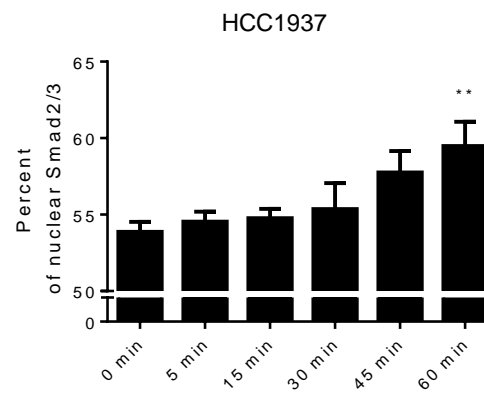

Supplementary Figure 4

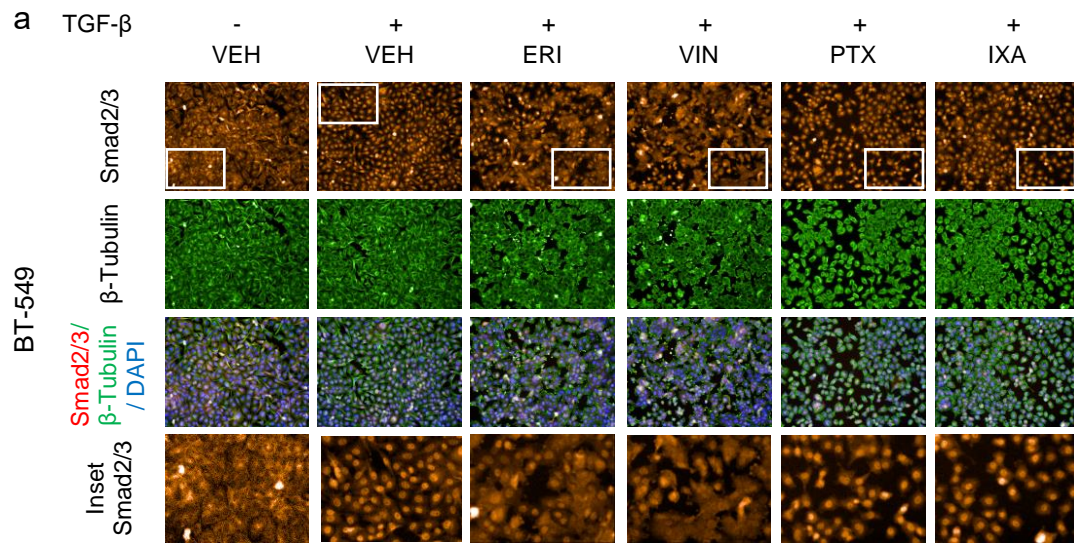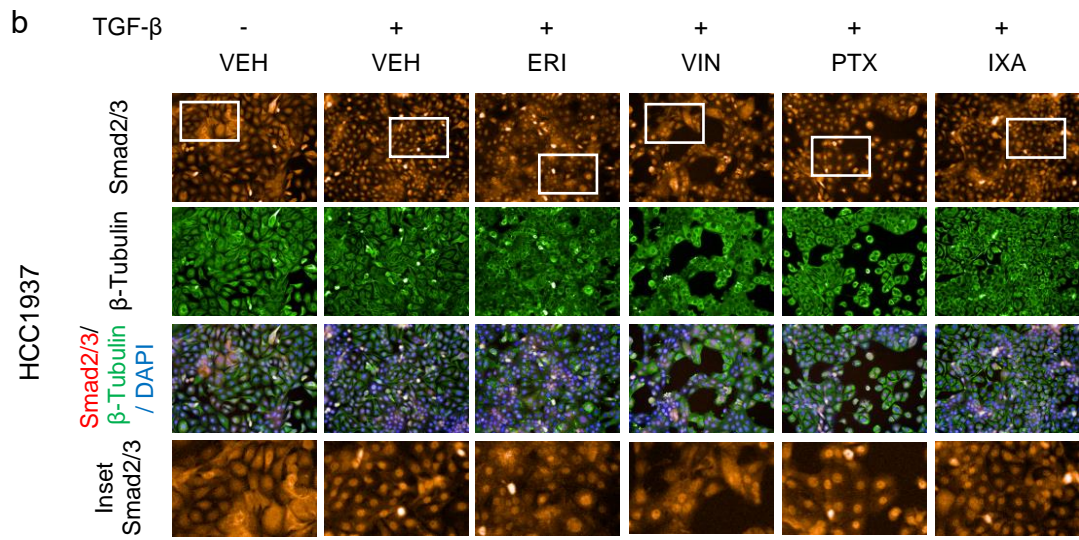

Supplementary Figure 5

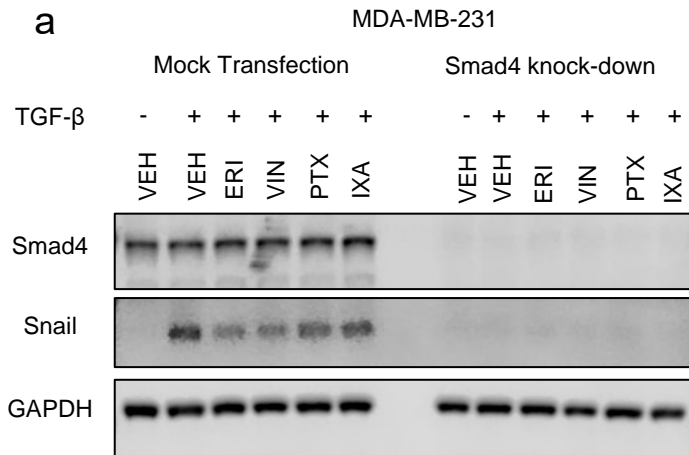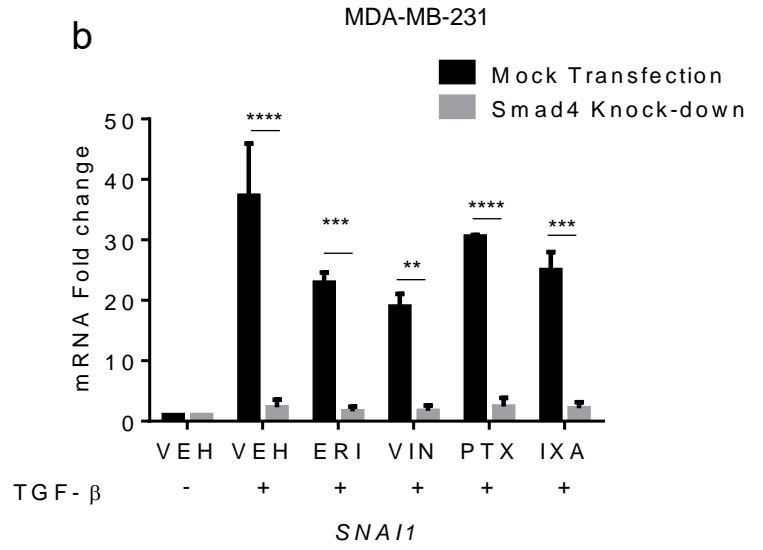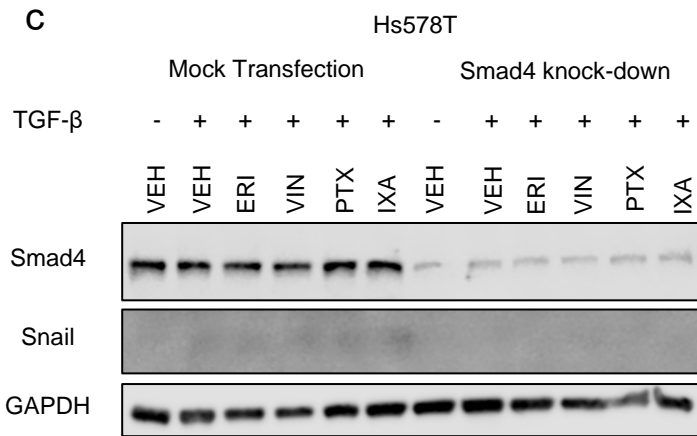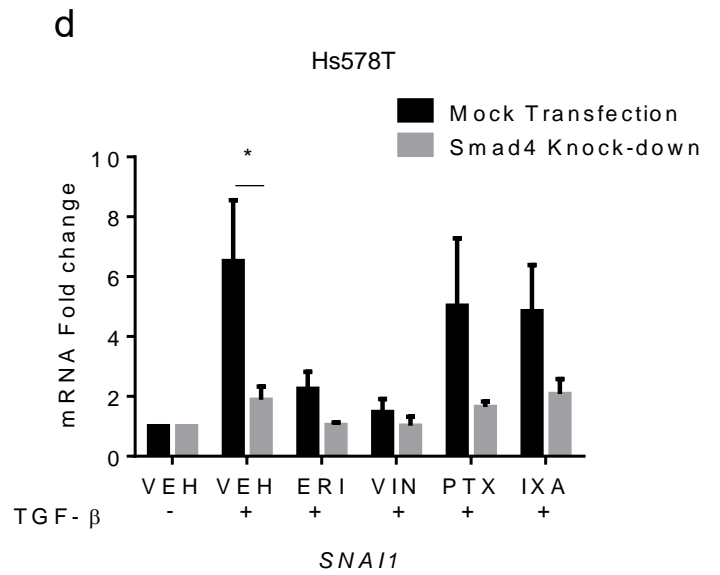

BT-549

a

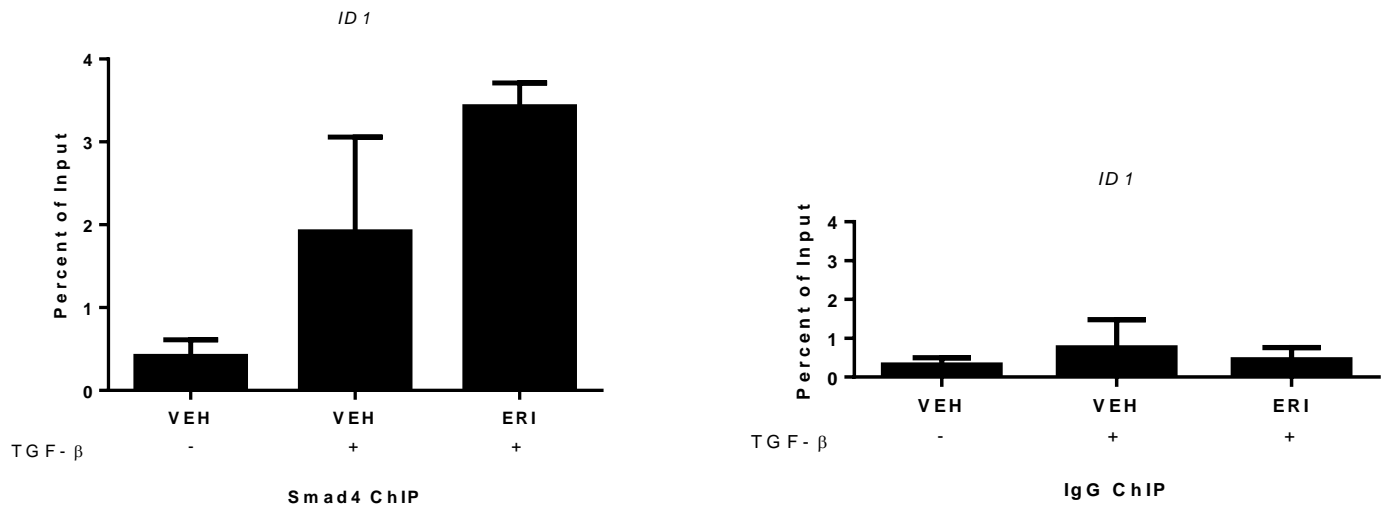

b

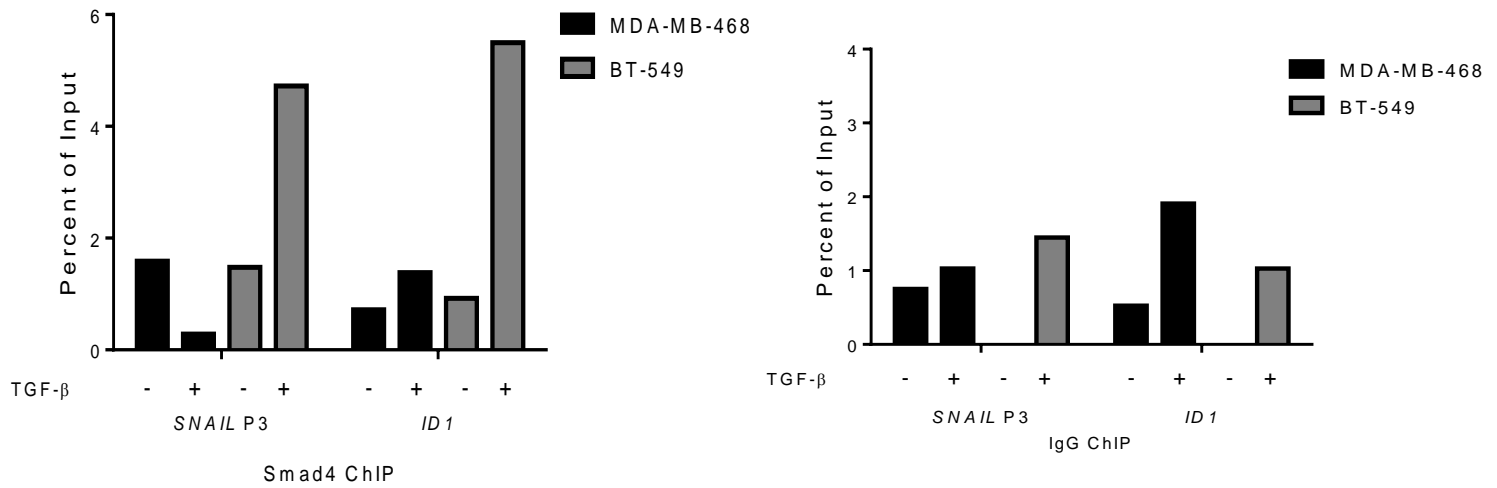

Supplementary Figure 7

**a**

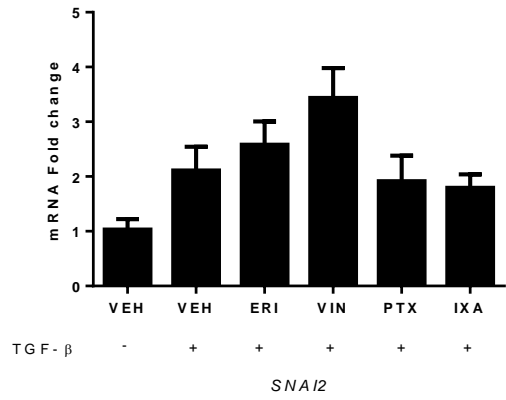

**b**

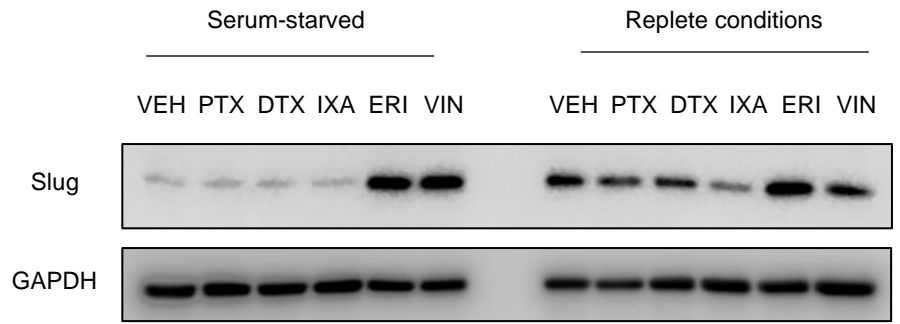

**c**

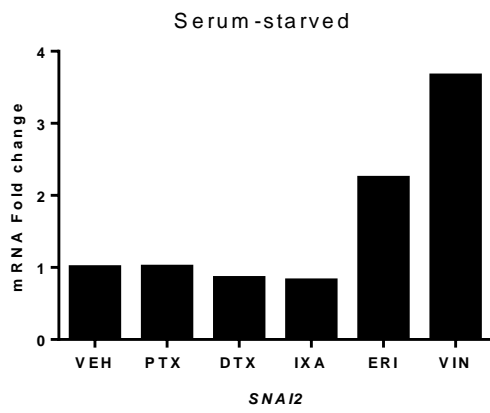

**d**

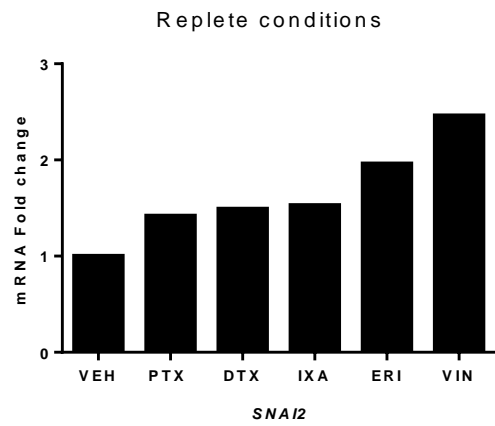

Supplementary Figure 8

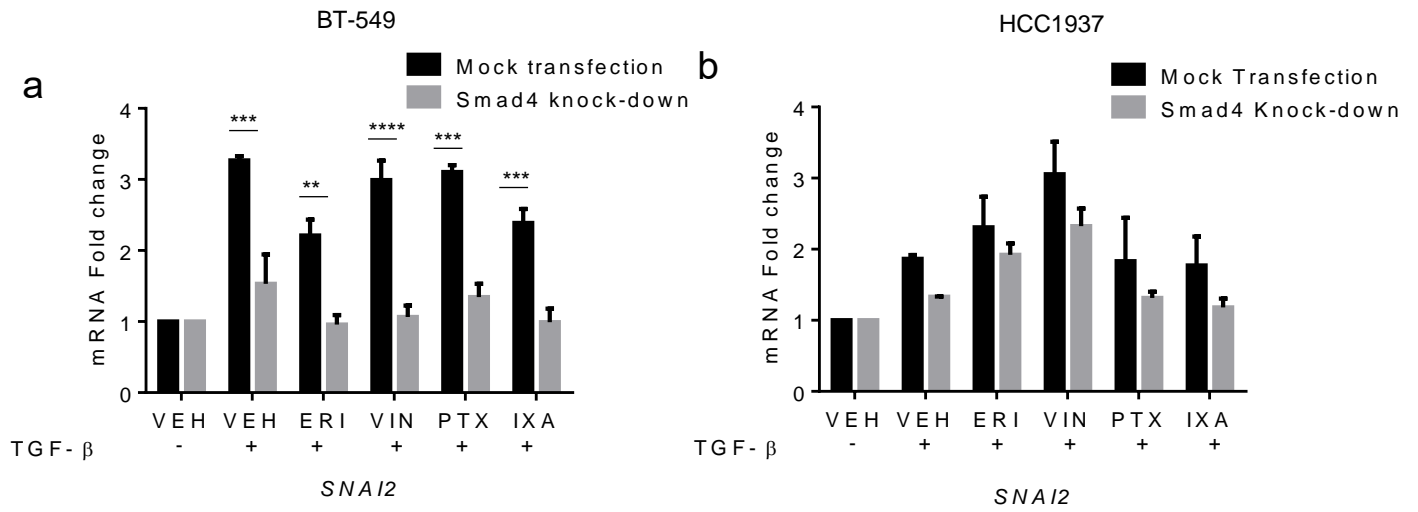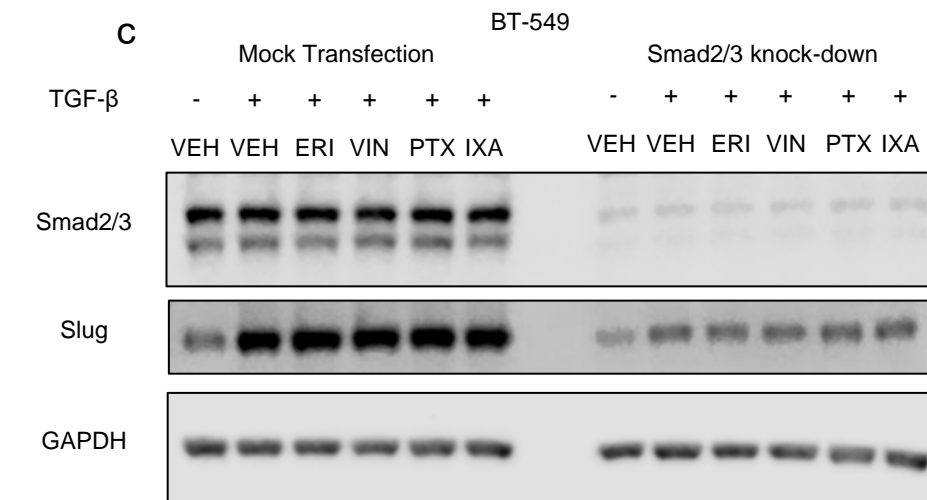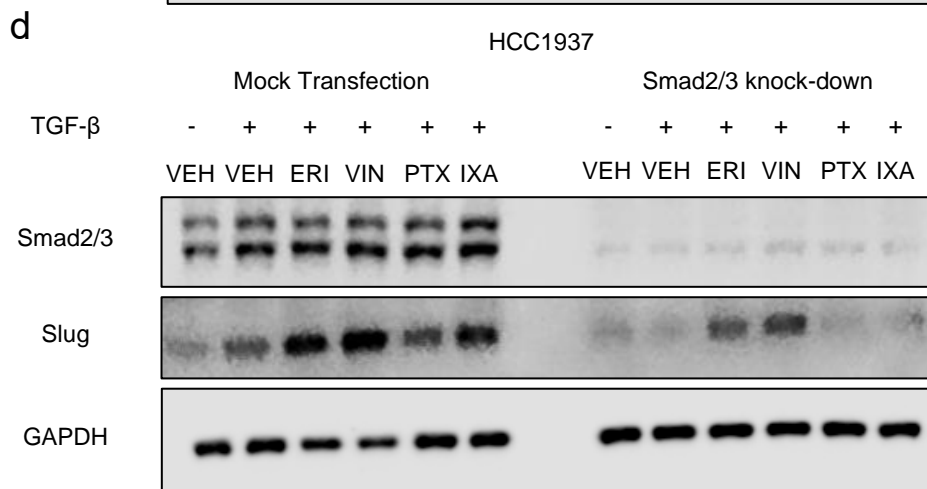



Supplementary Figure 9

a

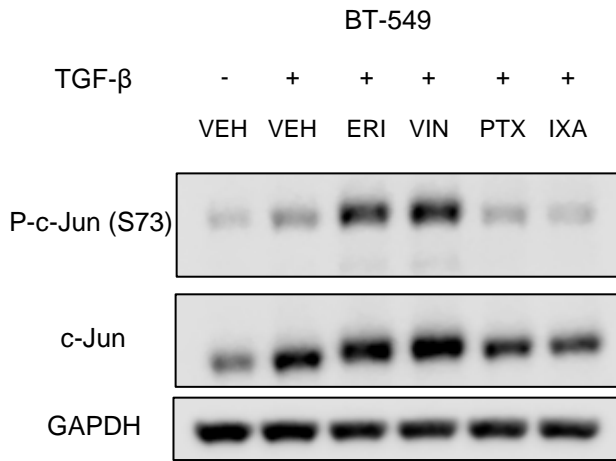

b

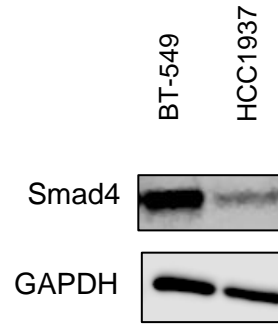

c

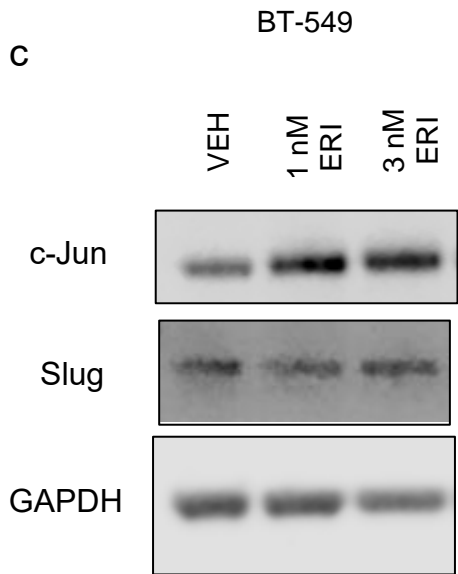

Supplementary Figure 10

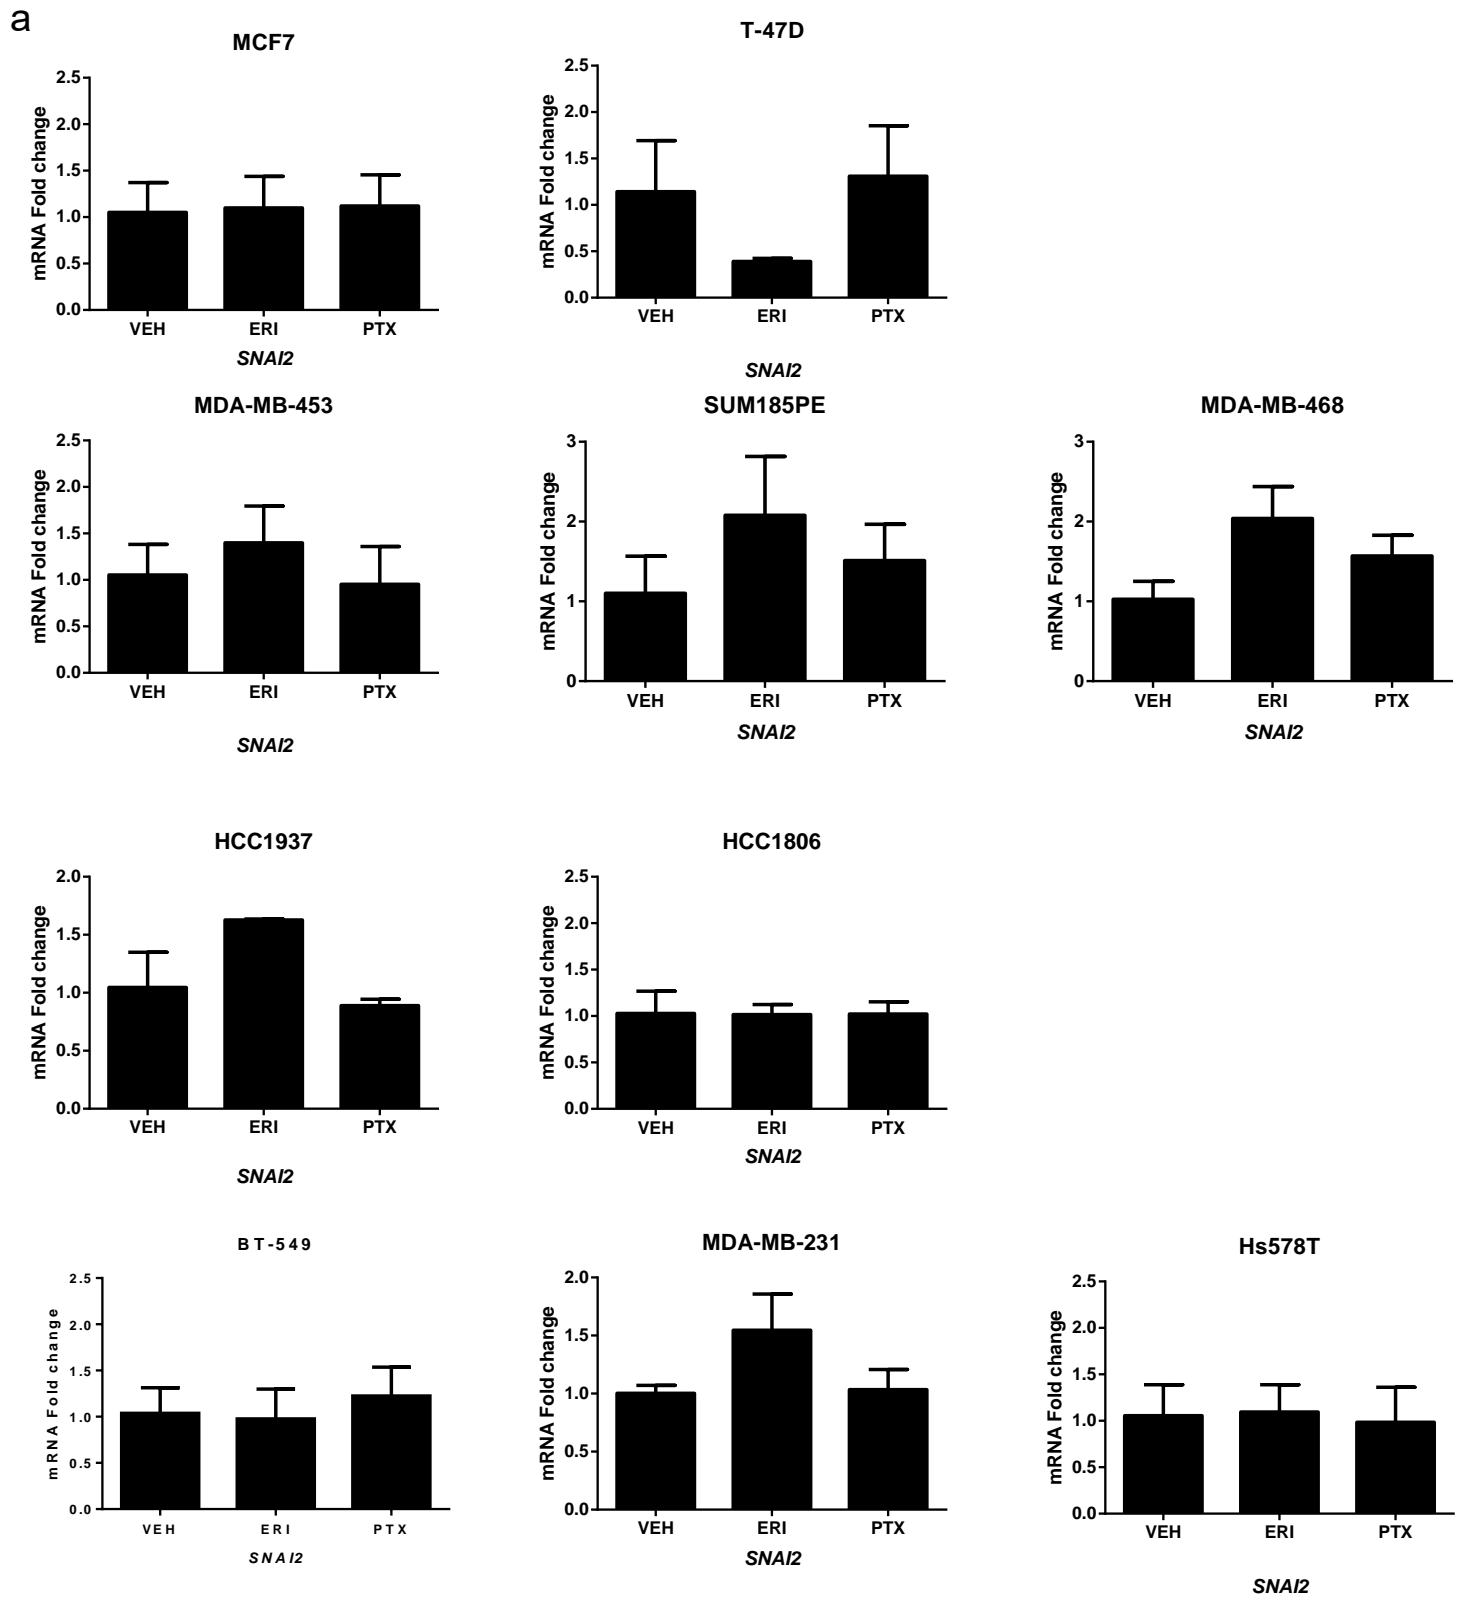

Supplementary Figure 11

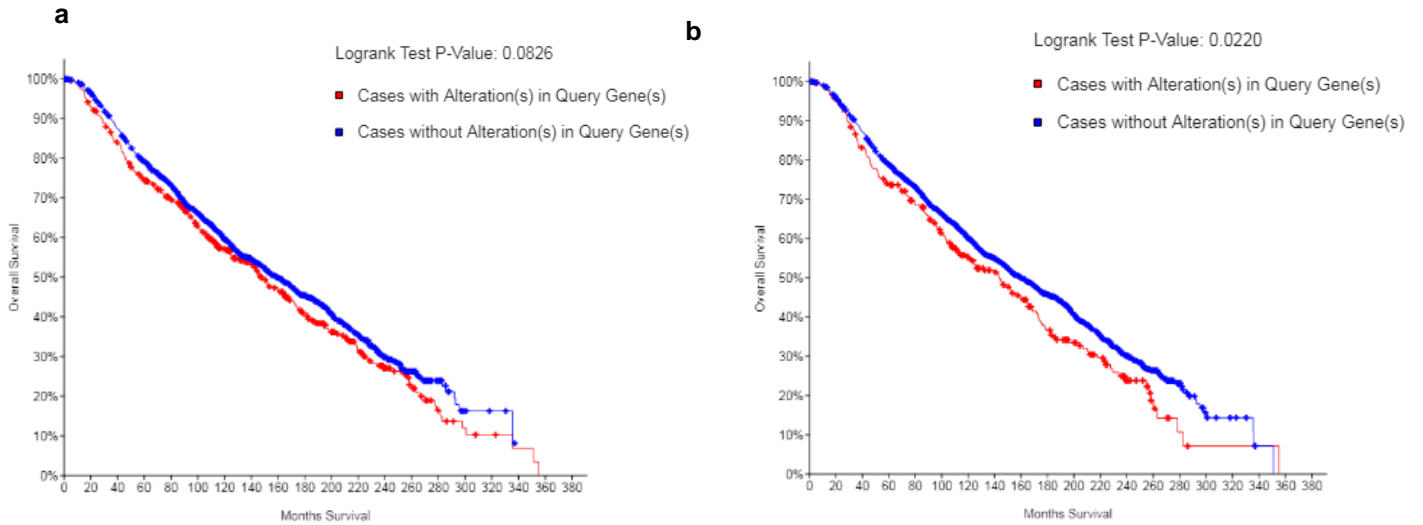

c. Kaplan-Meier survival analysis of patients enrolled in the METABRIC study comparing patients that have gene expression alterations in *SMAD4* and *SNAI2* to those that do not, shown in panel a, and followed for ~ 35 years.

|                                               | Number of Cases, Total | Number of Cases, Deceased | Median Month Survival |
|-----------------------------------------------|------------------------|---------------------------|-----------------------|
| Cases with Alteration(s) in Query Gene(s)     | 442                    | 276                       | 146.93                |
| Cases without Alteration(s) in Query Genes(s) | 1462                   | 827                       | 159                   |

d. Kaplan-Meier survival analysis of patients enrolled in the METABRIC study having gene alterations (mutations, deletions, amplification) in *SMAD4* and *SNAI2*, compared to survival of all other patients shown in b.

|                                               | Number of Cases, Total | Number of Cases, Deceased | Median Month Survival |
|-----------------------------------------------|------------------------|---------------------------|-----------------------|
| Cases with Alteration(s) in Query Gene(s)     | 268                    | 172                       | 143.13                |
| Cases without Alteration(s) in Query Genes(s) | 1713                   | 972                       | 159.7                 |

## Supplementary Figure legends

**Supplementary Figure 1:** The effects of microtubule targeting agents on TGF- $\beta$ -mediated Snail induction. **a, b.** mRNA expression analysis of *SNAIL* in MDA-MB-231 and Hs578T cells that were serum-starved for 18 h and then stimulated with TGF- $\beta$  for the indicated times. Data are the average of two independent experiments ( $\pm$  SEM). **c, d.** Western blot analysis of Snail and GAPDH from MDA-MB-231 and Hs578T cells that were serum-starved for 18 h and pretreated with microtubule targeting agents for 2 h followed by a 3 h TGF- $\beta$  stimulation. **e, f.** mRNA analysis of *SNAIL* transcript in cells that were serum-starved for 18 h and pretreated with microtubule targeting agents for 2 h and then stimulated with TGF- $\beta$  for either 2 h (MDA-MB-231 cells) or 1 h (Hs578T cells). Data are the average of 3 independent experiments ( $\pm$  SEM). Statistical significance was assessed using a one-way ANOVA with Dunnett's post-hoc test compared to TGF- $\beta$ -stimulated vehicle controls. (\*\*\*\*  $p < 0.0001$ , \* $p < 0.05$ )

**Supplementary Figure 2:** Effects of microtubule targeting agents on downstream targets of the TGF- $\beta$  pathway. **a, b.** Western blot analysis of Smad2/3, Smad4, Snail, Slug, and GAPDH in whole-cell lysates from BT-549 and HCC1937 cells that were treated with microtubule targeting agents for 5 h.

**Supplementary Figure 3:** Time-dependent nuclear accumulation of Smad2/3 after TGF- $\beta$  stimulation. **a, c.** Immunofluorescence images of Smad2/3 in BT-549 and HCC1937 cells. Cells were serum-starved for 18 h and then stimulated with TGF- $\beta$  for the times indicated. Images were obtained using the Operetta™ high content imager and are representative of two independent experiments. **b, d.** The percentage of total Smad2/3 present in the nucleus of BT-549 and HCC1937 cells at each time point was quantified using high content imaging. Data are reported for two individual experiments, each comprising 2-3 replicates and reported as mean  $\pm$  SEM (N=7). Statistical significance compared to control (0 min) was assessed using a one-way ANOVA with Dunnett's post-hoc test (\*\*\*\*  $p < 0.0001$ , \*\*\*  $p < 0.001$ , \*\*  $p < 0.01$ , \* $p < 0.05$ ).

**Supplementary Figure 4:** Effect of microtubule targeting agents on TGF- $\beta$ -induced nuclear accumulation of Smad2/3. **a.**  $\beta$ -tubulin and Smad2/3 were visualized by immunofluorescence in BT-549 cells. Cells were serum-starved for 18h, pretreated with microtubule targeting agents for 2 h and stimulated with TGF- $\beta$  for 45 min. Images were obtained using the Operetta™ high content imager and are representative of four independent experiments. Inset images show magnified view of Smad2/3 localization. **b.**  $\beta$ -tubulin and Smad2/3 localization was evaluated by immunofluorescence in HCC1937 cells. Cells were serum-starved for 18 h, pretreated with microtubule targeting agents for 2 h and stimulated with TGF- $\beta$  for 1 h. Images were obtained using the Operetta™ high content imager and are representative of four independent experiments. Inset images show magnified view of Smad2/3 localization.

**Supplementary Figure 5:** Requirement of Smad4 for TGF- $\beta$ -mediated Snail induction. **a, c.** Smad4 was transiently knocked-down by siRNAs in MDA-MB-231 and Hs578T cells. Western blot analysis of whole-cell lysates of cells after 18 h of serum-starvation, 2 h pretreatment with microtubule targeting agents followed by 3 h of TGF- $\beta$  stimulation. Immunoblots were probed for Smad4, Snail, and GAPDH. **b, d.** qRT-PCR analysis of *SNAIL* transcript after siRNA-mediated knock-down of Smad4. Cells were serum-starved for 18 h, pretreated with microtubule targeting agents for 2 h and stimulated with TGF- $\beta$  for either 2 h (MDA-MB-231) or 1 h (Hs578T). Statistical significance of Smad4 knock-down for each condition was determined using a two-way ANOVA with Holm-Sidak's multiple comparison test. (\*\*\*\*  $p < 0.0001$ , \*\*\*  $p < 0.001$ , \*\*  $p < 0.01$ , \* $p < 0.05$ ).

**Supplementary Figure 6:** Chromatin Immunoprecipitation of *ID1* promoter by Smad4. **a.** Chromatin immunoprecipitation (ChIP) of the *ID1* promoter region bound by Smad4, after 18 h of serum-starvation, pretreatment with either vehicle or eribulin for 2 h followed by stimulation with TGF- $\beta$  for 1 h in BT-549 cells. qRT-PCR data are reported as percentage of input chromatin for *ID1* promoter sequence and are the mean  $\pm$  SEM (N=2). Chromatin pulldown with control IgG is also shown. **b.** Smad4 ChIP of *SNAIL* P3 and *ID1* sequences from MDA-MB-468 and BT-549 cells. All cells were serum-starved for 18 h and then either left untreated or stimulated with TGF- $\beta$  (2 h in MDA-MB-

468 cells and 1 h in BT-549 cells). qRT-PCR data are reported as percentage of input chromatin for the promoter sequences from a single experiment.

**Supplementary Figure 7:** Effect of microtubule targeting agents on *SNAI2* induction in HCC1937 cells. **a.** qRT-PCR analysis of *SNAI2* mRNA transcript abundance in HCC1937 cells that were serum-starved for 18 h, 2 h pretreated for 2 h with microtubule targeting agents, then stimulated for 2 h with TGF- $\beta$ . Data are the average of three independent experiments ( $\pm$  SEM) **b.** Western blot analysis of whole-cell lysates from HCC1937 cells that were either serum-starved for 18 h or left in replete conditions and treated with microtubule targeting agents for 5 h. Immunoblots were probed for Slug and GAPDH. **c, d.** qRT-PCR analysis of *SNAI2* transcript in HCC1937 cells that were either serum-starved for 18 h or left in replete conditions and treated with microtubule targeting agents for 4 h. Data represent a single experiment.

**Supplementary Figure 8:** Impact of Smad2/3/4 knock-down on *SNAI2* expression. **a, b.** Smad4 was transiently knocked-down using siRNAs in BT-549 and HCC1937 cells. qRT-PCR analysis of *SNAI2* mRNA transcript abundance was quantified in cells that were serum-starved for 18 h, pretreated with microtubule targeting agents for 2 and then stimulated with TGF- $\beta$  (1 h in BT-549 cells and 2 h in HCC1937 cells). Data are the average of two independent experiments ( $\pm$  SEM) and statistical significance of Smad4 knock-down for each condition was determined using a two-way ANOVA with Holm-Sidak's multiple comparison test. (\*\*\*\*  $p < 0.0001$ , \*\*\*  $p < 0.001$ , \*\*  $p < 0.01$ , \*  $p < 0.05$ ). **c, d.** Smad2/3 proteins were transiently knocked-down in BT-549 and HCC1937 cells using siRNAs. Western blot analysis of whole-cell lysates were evaluated after 18 h of serum-starvation, 2 h pretreatment with microtubule targeting agents followed by a 3 h TGF- $\beta$  stimulation. Immunoblots were probed for Smad2/3, Slug, and GAPDH. These results are from the experiment shown in Fig. 1e, f.

**Supplementary Figure 9:** Effect of microtubule targeting agents on the expression of the transcription factor c-Jun. **a.** Western blot analysis of BT-549 whole-cell lysates. Cells were serum-starved for 18 h, pretreated with microtubule targeting agents for 2 h, followed by a 3 h stimulation with TGF- $\beta$ . Immunoblots were probed for total and phosphorylated forms of c-Jun and GAPDH. **b.** Western blot analysis of Smad4 and GAPDH from BT-549 and HCC1937 whole-cell lysates. Immunoblots were probed for Smad4. **c.** Western blot analysis of whole-cell lysates from cells treated with either vehicle or eribulin for 7 days. Immunoblots were probed for Slug, c-Jun, and GAPDH.

**Supplementary Figure 10:** *SNAI2* expression across breast cancer cell lines. **a.** Breast cancer cell lines were serum-starved for 18 h and treated with vehicle, eribulin or paclitaxel for 4 h. qRT-PCR analysis was performed to evaluate the mRNA expression of *SNAI2*. Data are the average of two independent experiments ( $\pm$  SEM).

**Supplementary Figure 11:** Evaluation of the METABRIC dataset for alterations in *SMAD4* and *SNAI2*. **a.** Kaplan-Meier survival analysis of patients from the METABRIC study followed up for ~ 35 years comparing patients that have gene expression alternations in *SMAD4* and *SNAI2* to those that do not. **b.** Kaplan-Meier survival analysis of patients in the METABRIC study having genetic alterations (including mutations, deletions, and amplification) in the *SMAD4* and *SNAI2*, compared to survival of all other patients.

Supplementary Table 1

| <b>Target</b>              | <b>Vendor Information</b>                  | <b>Application - Dilution</b> |
|----------------------------|--------------------------------------------|-------------------------------|
| Snail                      | Cell Signaling Technologies, 3879 (C15D3)  | WB – 1:1000                   |
| Slug                       | Cell Signaling Technologies, 9585 (C19G7)  | WB – 1:1000                   |
| GAPDH                      | Cell Signaling Technologies, 5174 (D16H11) | WB – 1:1000                   |
| Smad2/3                    | Cell Signaling Technologies, 8685 (D7G7)   | WB – 1:1000<br>IF – 1:400     |
| Phospho-Smad2 (Ser465/467) | Cell Signaling Technologies, 3108 (138D4)  | WB – 1:1000                   |
| Phospho-Smad3 (Ser423/425) | Millipore Sigma, 07-1389                   | WB – 1:1000                   |
| $\beta$ -Tubulin           | Sigma-Aldrich, T4026 (TUB 2.1)             | IF – 1:400                    |
| Smad4                      | Abcam, ab40759 (EP618Y)                    | WB – 1:1000                   |
| Smad4                      | Cell Signaling Technologies, 46535 (D3R4N) | ChIP – 10ul per IP            |
| c-Jun                      | Cell signaling Technologies, 9165 (60A8)   | WB – 1:1000                   |
| Phospho-c-Jun              | Cell Signaling technologies, 3270 (D47G9)  | WB – 1:1000                   |
| IgG                        | Millipore Sigma, 12-370                    | ChIP – 5ul per IP             |

WB – Western Blotting; IF – Immunofluorescence; ChIP – Chromosomal Immunoprecipitation

Supplementary Table 2

| Target                | Primer Sequence                                                      |
|-----------------------|----------------------------------------------------------------------|
| SNAI1                 | Forward : TCGGAAGCCTAACTACAGCGA<br>Reverse : AGATGAGCATTGGCAGCGAG    |
| SNAI2                 | Forward : CGAACTGGACACACATACAGTG<br>Reverse : CTGAGGATCTCTGGTTGTGGT  |
| GAPDH                 | Forward : ACAACTTTGGTATCGTGGAAGG<br>Reverse : GCCATCACGCCACAGTTTC    |
| SNA1 TSS <sup>1</sup> | Forward : GGAGTACTTAAGGGAGTTGGCGG<br>Reverse: GAACCACTCGCTAGGCCGT    |
| SNAI1 P3 <sup>2</sup> | Forward : TACTTAAGGGAGTTGGCGGC<br>Reverse : CGCAGAAGAACCACTCGCTA     |
| ID11                  | Forward : AGTCCGTCCGGGTTTTATGAAT<br>Reverse : CGGTCTGTGTCAGCGTCTGAAC |
| JUN                   | Forward : TCCAAGTGCCGAAAAGGAAG<br>Reverse : CGAGTTCTGAGCTTTCAAGGT    |

Smith, A. P. *et al.* A positive role for Myc in TGFbeta-induced

Snail transcription and epithelial-to-mesenchymal transition.

Oncogene 28, 422-430, doi:10.1038/onc.2008.395 (2009).

Li, D. *et al.* Role of RbBP5 and H3K4me3 in the vicinity of Snail transcription start site during epithelial-mesenchymal transition in prostate cancer cell.

Oncotarget 7, 65553-65567, doi:10.18632/oncotarget.11549 (2016)
